# Supplementary material for: Antagonistic regulation of the second mitotic wave by Eyes absent-Sine oculis and Combgap coordinates proliferation and specification in the Drosophila retina
Source: Oxford University Press journal article supplement (doi:10.1242/dev.147231), 2017-06-16
Supplement: dev147231supp.pdf [file dev147231supp.pdf]

## Supplementary Materials & Methods

### *Drosophila strains & genetics*

*UAS-cg* flies were made by amplifying the coding region from BDGP DGC cDNA clone LD05357 with oligos 5'-CATGGTACCTGTGCGCCGCCCAGAATCCGCC-3' and 5'-CACTCTAGACTAGCATACCTGTTGCTGCGATATGGCTG-3', subcloning into pUAS-FLAG-attB and integrating into the  $\phi$ C31 86FB landing site (Bischof et al., 2007).

The *RNAi* transgenes targeting *cg* are predicted to degrade hundreds of off-target transcripts and produced phenotypes we never observed in *cg* mutants (data not shown), while the perdurance of maternally deposited Cg protein (Ray et al., 2016) masked the null phenotype in all but the earliest-generated mitotic clones. We bypassed these problems by hand-picking first instar homozygous *cg* mutant larvae. These animals normally die at early larval stages when faced with competition from their heterozygous siblings, but when isolated and cultured independently, a small fraction survive to the late third instar, enabling analysis of their eye-antennal discs.

To determine the roles of *eya* and *so* and to assess their interactions with other genes in the SMW, we crossed *GMR-GAL4<sup>Zipursky</sup>/CyO,act-GFP* or *GMR-GAL4<sup>Zipursky</sup>,UAS-eya<sup>RNAi</sup>/CyO,dfd-YFP* to *w<sup>1118</sup>,UAS-so<sup>RNAi</sup>,UAS-stg<sup>RNAi</sup>,pnt<sup>A88</sup>/TM3,Ser,twi-GAL4,UAS-GFP,ttk<sup>le11</sup>/TM6B,Hu,Tb,FRT42D,cg<sup>A22</sup>/CyO,dfd-YFP*, or *UAS-cg*. Genetic interactions between *eya* and *cg* were assessed by crossing *ey-GAL4,ey-GAL4,UAS-eya<sup>RNAi</sup>,GMR-GAL4<sup>Zipursky</sup>/CyO,act-GFP*, or *GMR-GAL4<sup>Zipursky</sup>,UAS-eya<sup>RNAi</sup>/CyO,dfd-YFP* to *w<sup>1118</sup>,FRT42D,cg<sup>A22</sup>/CyO,dfd-YFP*, or *Df(2R)BSC401/CyO*. For ectopic Dac induction experiments, we crossed *dpp<sup>40C6</sup>-GAL4/TM6B,Hu,Tb,dpp<sup>40C6</sup>-GAL4,UAS-eya<sup>IIIa</sup>/TM6B,Hu,Tb,dpp<sup>57A1</sup>-GAL4/CyO,dfd-YFP*, or *dpp<sup>57A1</sup>-GAL4,UAS-eya<sup>I</sup>/CyO,dfd-YFP* to *w<sup>1118</sup>,FRT42D,cg<sup>A22</sup>/CyO,dfd-YFP*, or *UAS-cg*. To determine the role of *cg* in the eye-antennal imaginal disc, including the SMW, and to assess its genetic interaction with *eya* and *so*, we crossed *FRT42D,cg<sup>A22</sup>/CyO,dfd-YFP* to *eya<sup>Clift</sup>,FRT42D,cg<sup>A22</sup>/CyO,dfd-YFP* or *FRT42D,so<sup>3</sup>,cg<sup>A22</sup>/CyO,dfd-YFP* and compared with *w<sup>1118</sup>*. Mitotic or whole-eye clones were made by crossing *ey-FLP;FRT42D,ubi-GFP/CyO* or

$y^l, w^*$ ; *FRT42D, y<sup>+</sup>, GMR-hid, l(2)CL-R<sup>l</sup>/CyO; ey-GAL4, UAS-FLP to FRT42D, FRT42D, cg<sup>A22</sup>/CyO, dfd-YFP, eya<sup>Clift</sup>, FRT42D, cg<sup>A22</sup>/CyO, dfd-YFP, or eya<sup>A188</sup>, FRT42D, cg<sup>A22</sup>/CyO, dfd-YFP*. Flies were reared on standard cornmeal-molasses-agar medium and all crosses were at 25°C.

### *Immunohistochemistry & Microscopy*

Primary antibodies: rabbit  $\alpha$ -PH3 (1:2000, Upstate, 06-570), rat  $\alpha$ -ELAV (1:50, Developmental Studies Hybridoma Bank [DSHB], 7E8A10) (O'Neill et al., 1994), guinea pig  $\alpha$ -Eya (1:1000) (Silver et al., 2003), mouse  $\alpha$ -Dac (1:10, DSHB, mAbdac2-3) (Mardon et al., 1994), rabbit  $\alpha$ -FLAG (1:500, Sigma, F1804), mouse  $\alpha$ -Delta (1:1000, DSHB, C594.9B) (Fehon et al., 1990), mouse  $\alpha$ -Cut (1:100, DSHB, 2B10) (Blochliger et al., 1990), rabbit  $\alpha$ -cleaved caspase 3 (1:1000, Cell Signaling), and mouse  $\alpha$ -Pros (1:100, DSHB, MR1A) (Campbell et al., 1994). Secondary antibodies were from Jackson ImmunoResearch: donkey  $\alpha$ -rabbit-Cy3 (1:2000), donkey  $\alpha$ -rabbit-488 (1:2000), donkey  $\alpha$ -rat-Cy3 (1:2000), donkey  $\alpha$ -rat-488 (1:2000), donkey  $\alpha$ -mouse-Cy3 (1:2000), or donkey  $\alpha$ -guinea pig-488 (1:2000). Oregon Green 488 Phalloidin (1:2000, Thermo Fisher Scientific) and DAPI (1:2000, Invitrogen) were used to detect actin and DNA, respectively. The Click-iT EdU Alexa Fluor 594 Imaging Kit (Molecular Probes, C10339) was used to label DNA synthesis.

For antibody staining, third instar eye-antennal imaginal discs were dissected in S2 cell medium, fixed for 10 min in 4% paraformaldehyde with 0.1% Triton X-100, washed 3X in PBT (1X PBS, 0.1% Triton), blocked in PNT (1X PBS, 0.1% Triton, 1% normal goat serum), stained with primary antibodies in PNT overnight at 4° C, washed 3X in PBT, and stained with secondary antibodies in PNT for 2 h at room temperature or overnight at 4° C. Pupal and adult tissues were treated in the same manner, except that halved heads were fixed for 20 min prior to dissecting the retinas, and then post-fixed for 10 min.

For S-phase detection, dissected discs were incubated in 10  $\mu$ M EdU in PBS for 60 min at room temperature, rinsed 5 min in PBS, fixed for 15 min in 4% paraformaldehyde in PBS, washed 3X 5 min in PBS with 0.3% Triton X-100 (PBT3), washed 20 min in PBS

with 0.6% Triton X-100 (PBT6), washed 2X 5 min in PBT3 with 3% BSA (PBT3B), incubated in the Click-iT reaction mixture 30 min in the dark, washed 5 min in PBT3B; washed 2X 5 min in PBT and mounted.

All primary antibodies used in this study are standard reagents in the fly eye field and have been subject to extensive prior validation. Additional validation of antibody specificity from our study included comparison of expression pattern, levels and subcellular localization in wild type versus mutant or overexpressed imaginal tissues and in transiently transfected S2 cells, as well as recapitulation of previously described and published expression patterns.

#### *In vitro pulldown assays*

GST-fusion proteins were expressed in BL21 *E. coli* cells, bound by Protino Glutathione Agarose 4B (Machery-Nagel), washed, and cleaved by TEV protease as necessary.

Pulldown assays were performed by mixing equimolar amounts of the desired proteins in binding buffer (20 mM Tris, 100 mM NaCl, 0.1 mM EDTA, 2.5 mM MgCl<sub>2</sub>, 0.1% NP-40, 10% glycerol, 100 ug/mL BSA). Binding reactions were incubated at 4° C for 2 h in the presence of glutathione sepharose resin, washed 3X in binding buffer with either 100 mM, 500 mM, or 1 M NaCl, boiled, resolved by SDS-PAGE, immunoblotted and imaged on a Li-COR Odyssey.

#### *Transcription Assays in cultured S2 cells*

$2.25 \times 10^6$  of *Drosophila* S2 cells plated in 12-well plates in 1.5 mL of Schneider's medium (Sigma) with 10% insect medium supplement (Sigma), penicillin (Invitrogen), and streptomycin (Invitrogen) were transfected in duplicate with a mixture of dimethyldioctadecyl-ammonium bromide (DDAB) (Sigma) containing 750 ng of total plasmid DNA. After 48 h, cells were lysed in 100 mM KH<sub>2</sub>PO<sub>4</sub>, 0.5% NP-40, and 1 mM DTT at pH 7.8, incubated 1 h on ice, spun, and loaded into a tube luminometer in triplicate 50 µL aliquots (EG&G Berthold Autolumat LB953). Firefly and Renilla luciferases were activated by exposure of lysates to 100 µL of 0.01 M Magnesium acetate, 0.1 M Tris acetate, 1 mM EDTA, 76.9 µM luciferin (BD Pharmingen), and 4.62 mM ATP (Fisher) at pH 7.8 or 25 mM Sodium pyrophosphate, 10 mM Sodium acetate, 15 mM EDTA, 0.5 M

Na<sub>2</sub>SO<sub>4</sub>, 0.5 M NaCl, and 4 μM coelenterazine (Promega) at pH 5.0, respectively. Empty vector was used to standardize the amount of DNA transfected across conditions, and all measurements were normalized to the activity of Renilla luciferase expressed under the control of an *actin* promoter.

To generate the 2X-LMEE reporter, we inserted a SalI restriction site into the multiple cloning site of pBS-TATA-luciferase (Silver et al. 2003) and ligated in two copies of the *LMEE* sequence amplified with 5'-

CAGCTCGAGAGCGCACATTCTTGCCACATCCTTG-3' and 5'-

GCGGTCGACCATTAACAAAATAAAAAAGGGGAACGACTCGTGCG-3'. The

Gateway system (Invitrogen) was used to insert the full-length *cg* cDNA, amplified with 5'-CGCGGATCCGGCTGTGCCGCCCAGAATCCG-3' and 5'-

TGGCTCGAGAGTCTAGCATACCTGTTGCTGCGA-3' and subcloned into pENTR-3C, into the actin5C S2 cell expression vector pAFW.

S2 cells were replaced from frozen stocks every six months and were not authenticated or tested for contamination within that interval.



Supplementary Figures

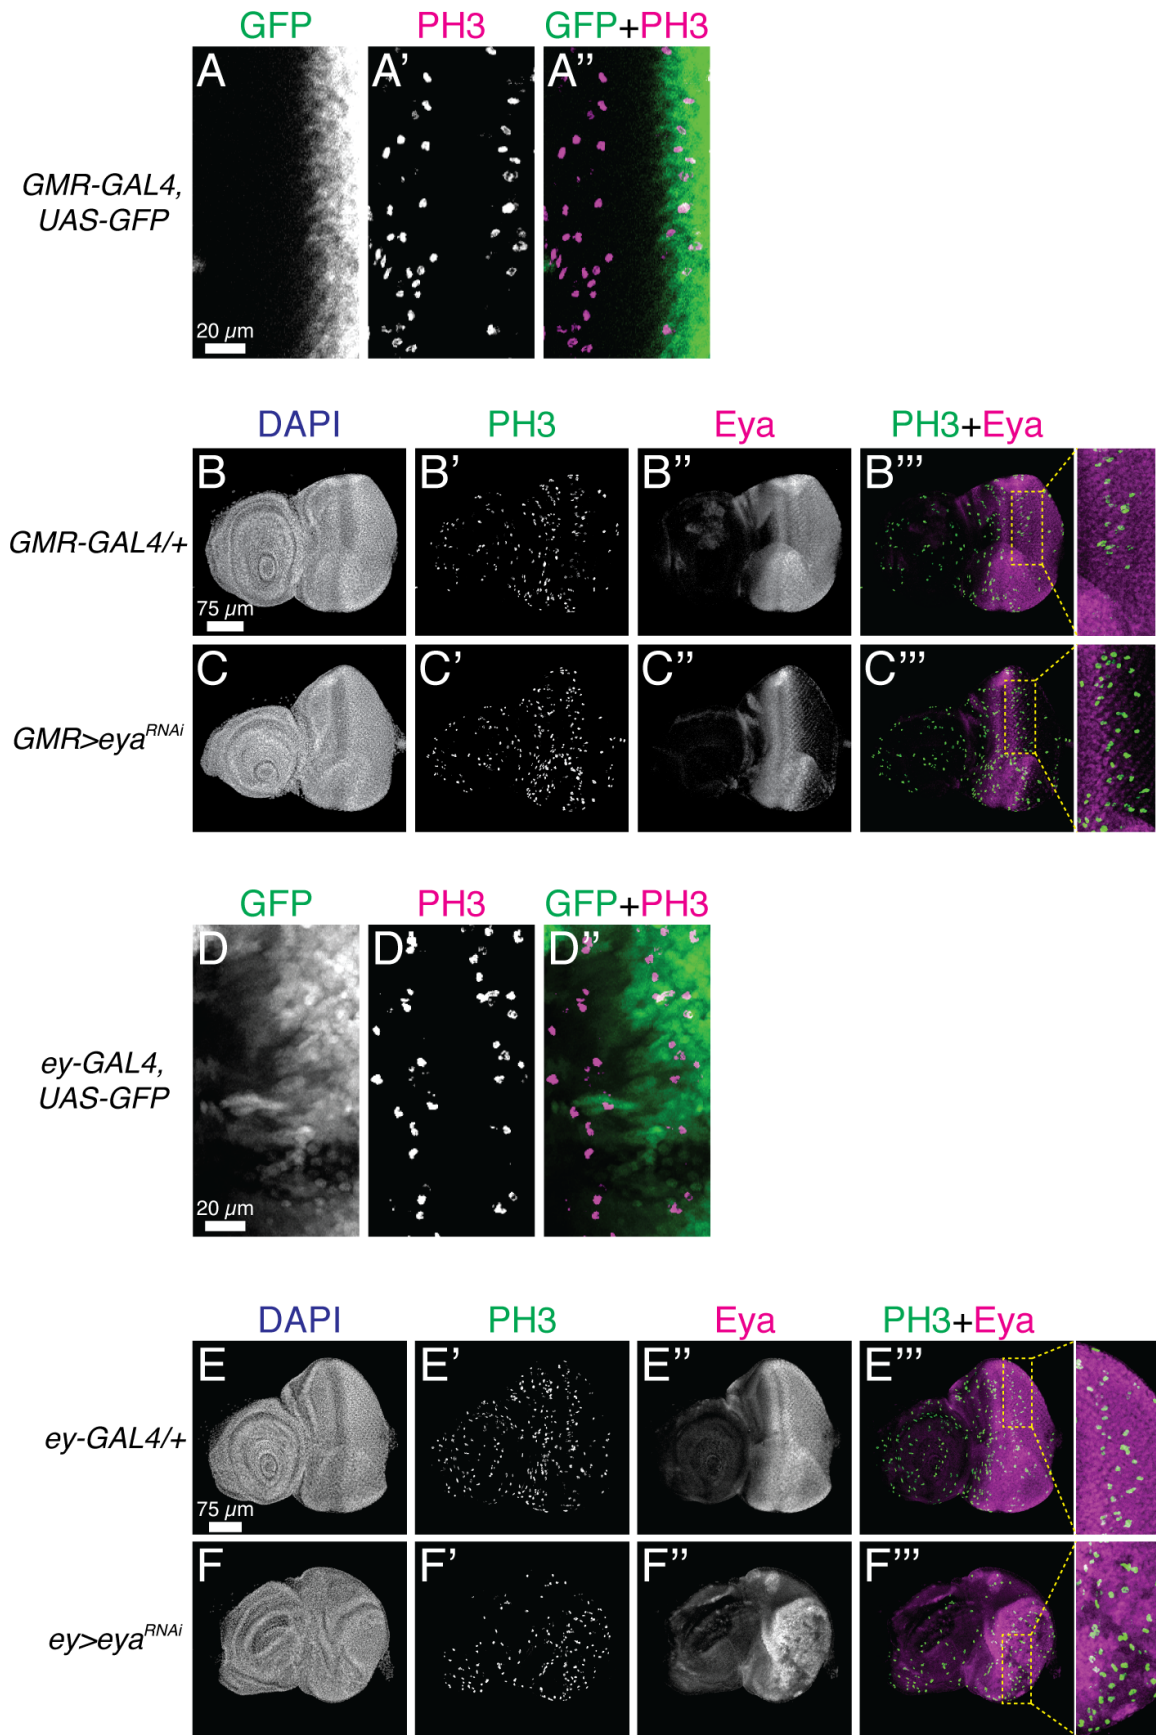

**Fig. S1. Knockdown under *GMR-GAL4* depletes protein levels by the SMW.** All images are maximum projections through representative third instar eye-antennal imaginal discs. Anterior is to the left and dorsal is up. PH3 was used to mark the SMW (A) *GMR-GAL4* drives GFP expression in a domain overlapping the SMW. Panels are zoomed views centered on the MF. (B-C) *eya* knockdown under *GMR-GAL4* strongly reduces Eya protein levels at the SMW. (D) *ey-GAL4* drives GFP expression at and before the SMW. (E) *eya* knockdown under *ey-GAL4* lowers Eya protein levels before and in the SMW and increases SMW proliferation posterior to the MF.

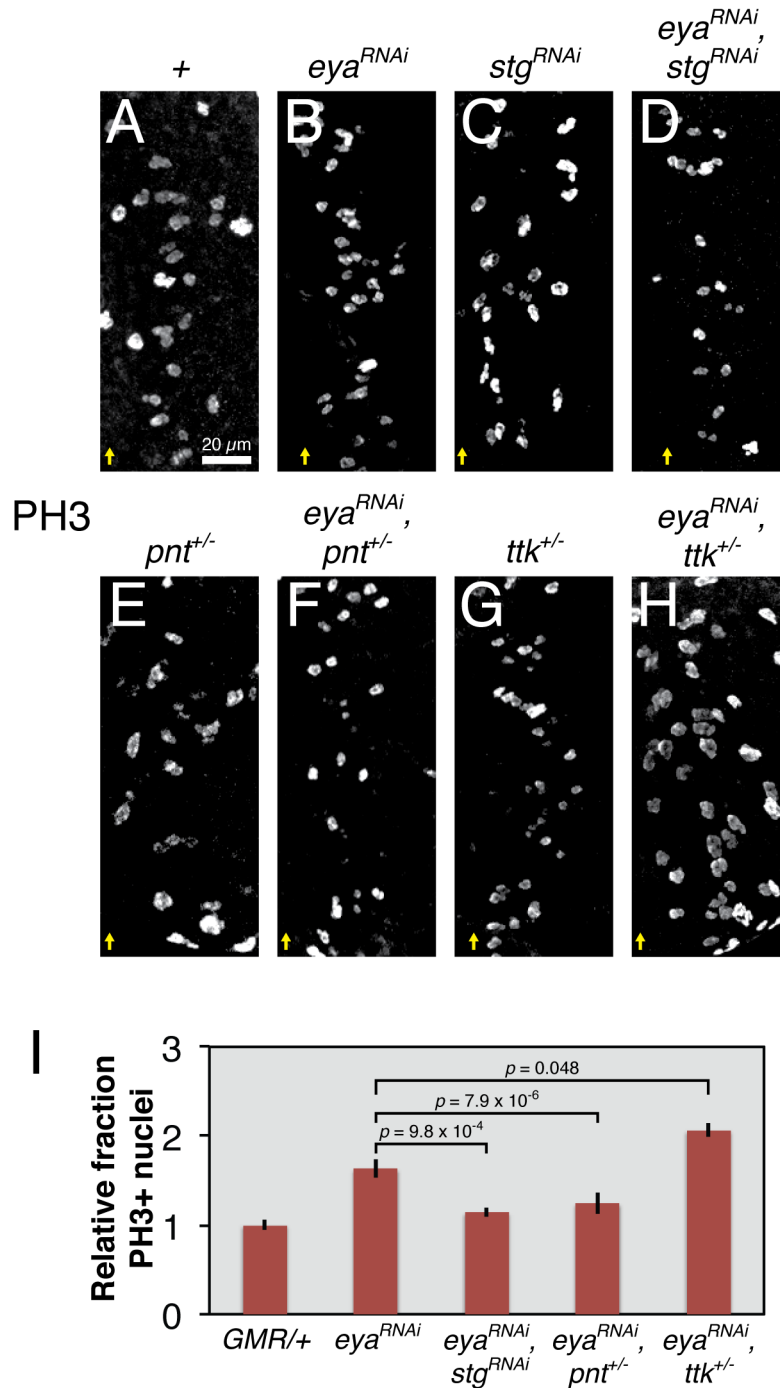

**Fig. S2. Genetic interactions between *eya* and M phase regulators at the SMW.** All images show representative late third instar eye-antennal imaginal discs. Yellow arrows mark the ventral edge of the MF. *UAS* transgenes were expressed with *GMR-GAL4*. (A-D) Dominant suppression of the increased SMW mitotic rate in *eya* knockdown discs by weak *string* knockdown that on its own does not impair the SMW. (T-W) Dominant suppression and enhancement of the *eya*

knockdown SMW phenotype by reducing the dose of *pnt* or *ttk*, respectively. (X) Quantification of mitotic rates for genotypes in P-W ( $n \geq 7$ ), calculated as in G. Actual PH3 counts for C-F and P-W in Supplementary Table 1.

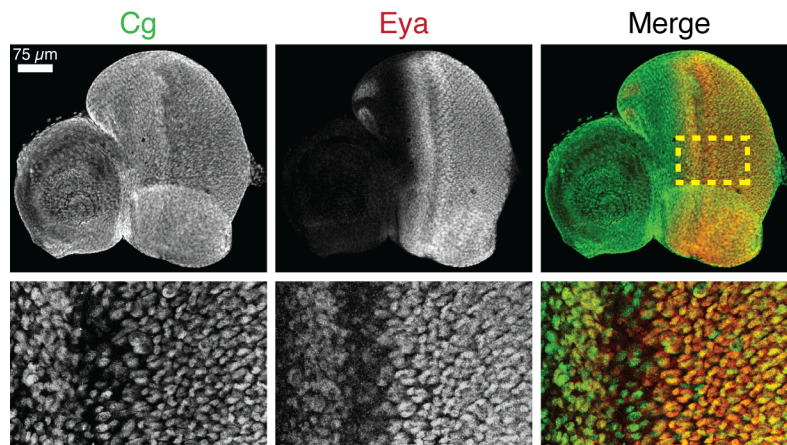

**Fig. S3. Cg and Eya are co-expressed in the eye imaginal disc.** A homozygous *cg-GFP* disc was stained with rabbit anti-GFP and guinea pig anti-Eya. The top row shows maximum confocal projections, while the zoomed views in the bottom row are partial projections focused on the photoreceptors. The yellow box shows the position of the zoomed panels in the disc.

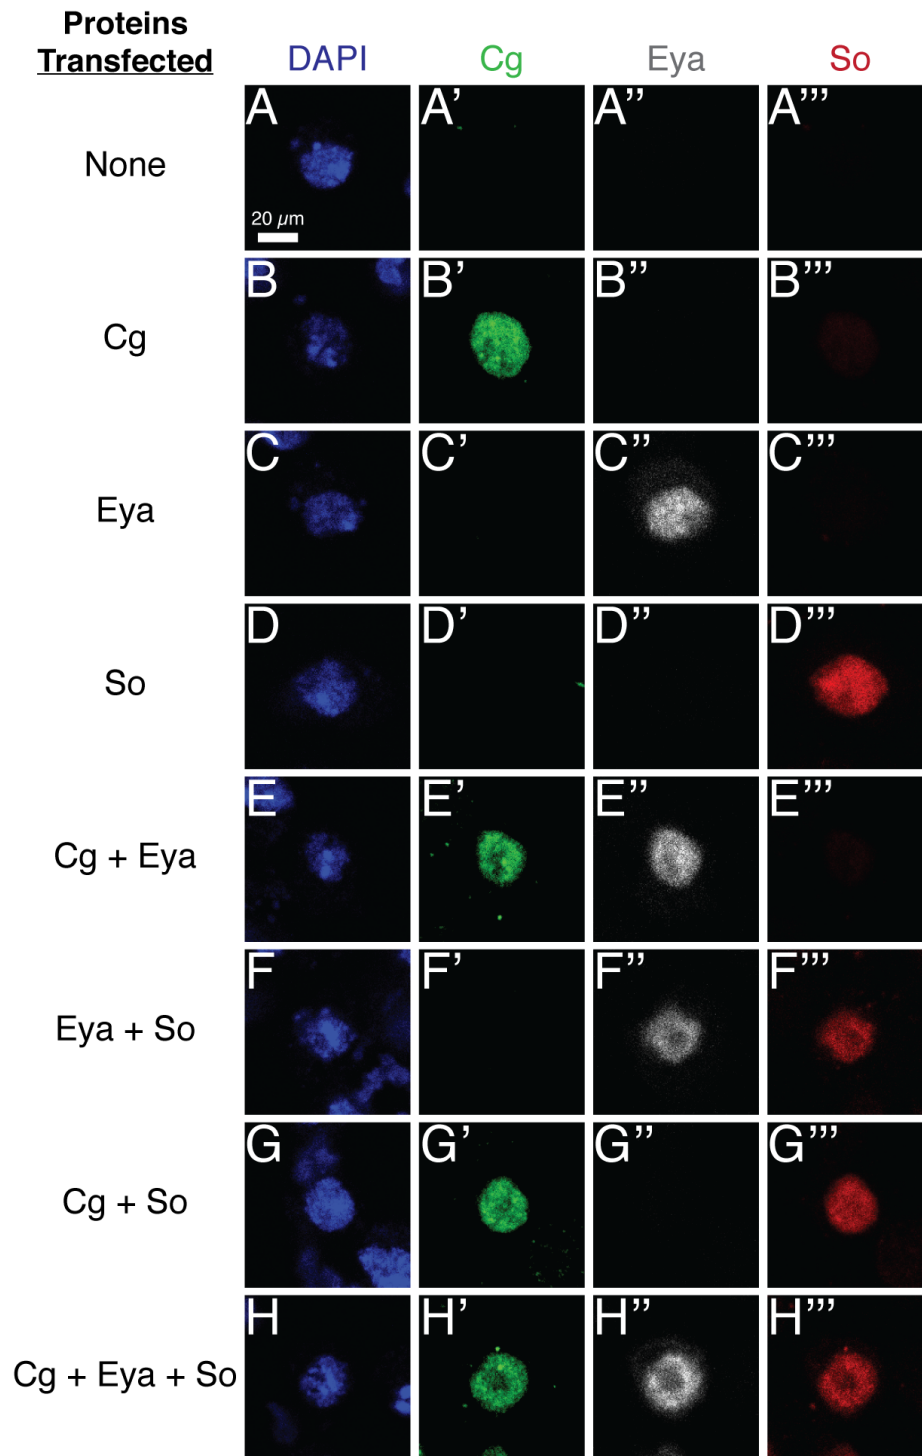

**Fig. S4. Eya, So, and Cg co-localize in the nuclei of cultured S2 cells.** All images are single confocal slices through the nuclei of representative S2 cells. Cells were transiently transfected with plasmids encoding the proteins indicated to the left of each row, fixed, and stained for the proteins indicated above each column.

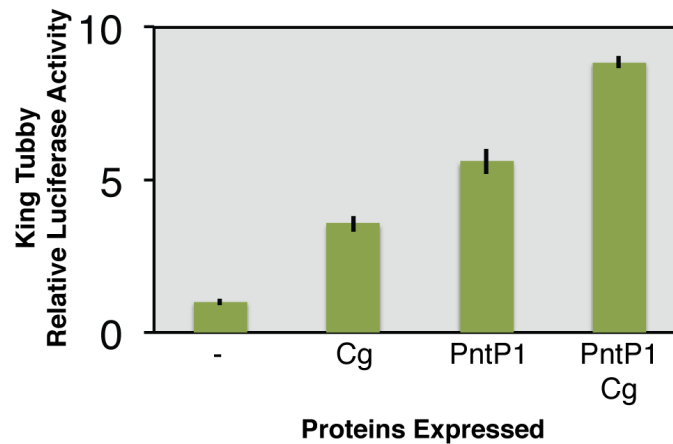

**Fig. S5. Cg does not limit the ability of PntP1 to activate transcription.** Experimental conditions are identical to Fig. 3A, except for expression of PntP1 and use of a Pnt-responsive *King Tubby* reporter (Webber et al., 2013). This experiment was replicated independently twice. Note that Cg alone activates expression of this reporter and additively increases output relative to PntP1 alone.

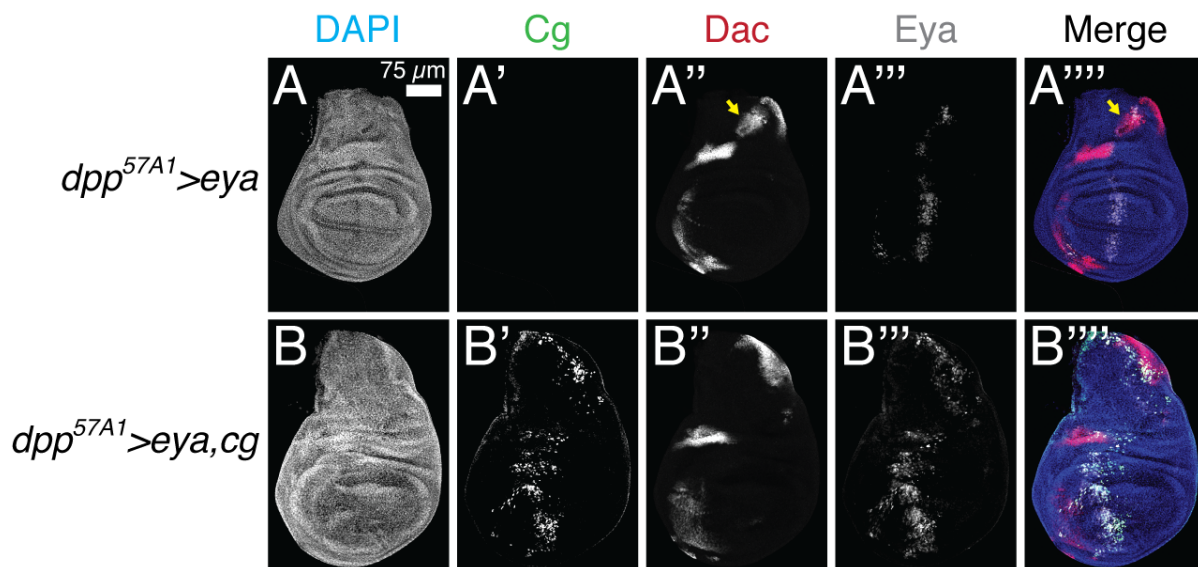

**Fig. S6. Co-overexpressing *cg* does not reduce Eya levels in wing imaginal discs.**

Experimental and imaging conditions are identical to Fig. 3F and H, except that the tissue was also stained with guinea pig anti-Eya. The aberrant folding in discs co-overexpressing *eya* and *cg* expanded the Eya expression stripe, making the reduced induction of ectopic Dac even more striking.



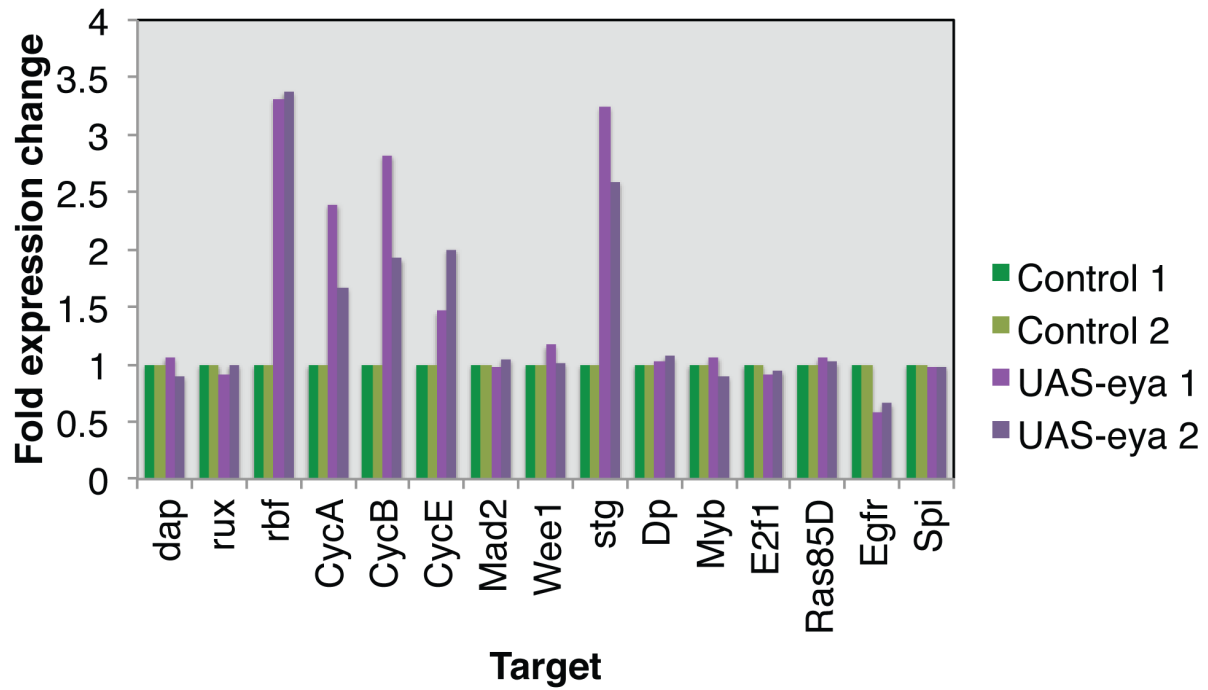

**Fig. S7. The effect of *eya* overexpression on the transcription of cell cycle regulators in the eye-antennal imaginal disc.** Raw data were obtained from Jemc et al., 2007. Two experimental replicates are shown. All bars are normalized to the control conducted with that replicate.

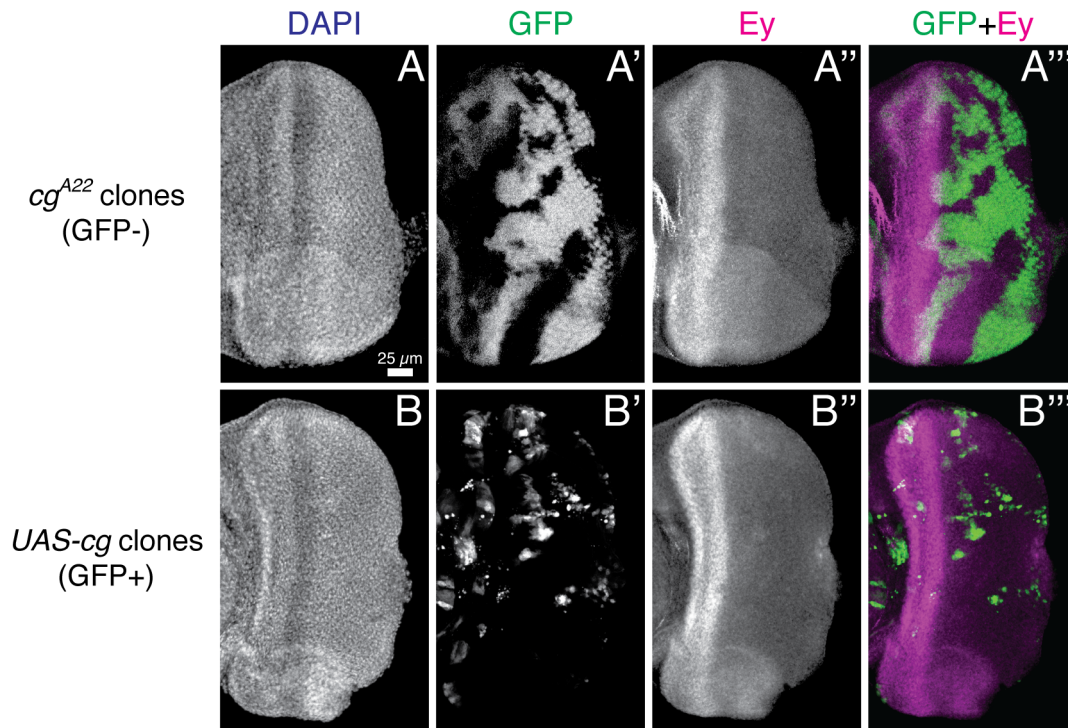

**Fig. S8. *cg* does not control *Ey* expression in the eye imaginal disc.** All images are maximum confocal projections of late third instar eye-antennal imaginal discs. Anterior is to the left and dorsal is up. (A) Mitotic *cg* clones do not affect *Ey* levels anterior to the MF or de-repress *Ey* posterior to the MF. (B) *FLP-out* clones overexpressing *cg* do not lower *Ey* levels in the proneuronal domain or affect expression posterior to the MF.



| Figure | Genotype                         | PH3+ Nuclei | MF length (µm) | PH3+ nuclei/µm MF | Normalization factor | Normalized  |
|--------|----------------------------------|-------------|----------------|-------------------|----------------------|-------------|
| 1G     | GMR-GAL4/+                       | 84          | 553.657        | 0.151718483       | 0.130309313          | 1.164295006 |
| 1G     | GMR-GAL4/+                       | 71          | 546.557        | 0.129904109       | 0.130309313          | 0.996890441 |
| 1G     | GMR-GAL4/+                       | 86          | 577.453        | 0.14892987        | 0.130309313          | 1.142895054 |
| 1G     | GMR-GAL4/+                       | 72          | 560.545        | 0.128446423       | 0.130309313          | 0.985704087 |
| 1G     | GMR-GAL4/+                       | 69          | 593.247        | 0.116309058       | 0.130309313          | 0.892561364 |
| 1G     | GMR-GAL4/+                       | 86          | 623.529        | 0.137924619       | 0.130309313          | 1.058440229 |
| 1G     | GMR-GAL4/+                       | 80          | 592.12         | 0.135107748       | 0.130309313          | 1.036823424 |
| 1G     | GMR-GAL4/+                       | 53          | 563.026        | 0.094134196       | 0.130309313          | 0.722390395 |
| 1G     | GMR-GAL4,UAS-eyaRNAi/+           | 81          | 469.539        | 0.172509632       | 0.130309313          | 1.323847294 |
| 1G     | GMR-GAL4,UAS-eyaRNAi/+           | 71          | 453.067        | 0.156709714       | 0.130309313          | 1.202597957 |
| 1G     | GMR-GAL4,UAS-eyaRNAi/+           | 90          | 481.892        | 0.186763839       | 0.130309313          | 1.433234774 |
| 1G     | GMR-GAL4,UAS-eyaRNAi/+           | 58          | 287.487        | 0.201748253       | 0.130309313          | 1.548225893 |
| 1G     | GMR-GAL4,UAS-eyaRNAi/+           | 104         | 456.654        | 0.227743543       | 0.130309313          | 1.747715013 |
| 1G     | GMR-GAL4,UAS-eyaRNAi/+           | 77          | 432.304        | 0.1781154         | 0.130309313          | 1.366866234 |
| 1G     | GMR-GAL4,UAS-eyaRNAi/+           | 75          | 498.05         | 0.15058729        | 0.130309313          | 1.155614182 |
| 1G     | GMR-GAL4,UAS-eyaRNAi/+           | 88          | 495.807        | 0.177488418       | 0.130309313          | 1.36205474  |
| 1G     | GMR-GAL4,UAS-eyaRNAi/+           | 95          | 506.719        | 0.187480635       | 0.130309313          | 1.438735502 |
| 1G     | GMR-GAL4,UAS-eyaRNAi/+           | 74          | 447.314        | 0.165431889       | 0.130309313          | 1.269532352 |
| 1G     | GMR-GAL4/UAS-scRNAi              | 104         | 582.543        | 0.178527594       | 0.130309313          | 1.370029426 |
| 1G     | GMR-GAL4,UAS-scRNAi              | 109         | 578.237        | 0.188504022       | 0.130309313          | 1.446589019 |
| 1G     | GMR-GAL4/UAS-scRNAi              | 79          | 443.23         | 0.178237033       | 0.130309313          | 1.367799647 |
| 1G     | GMR-GAL4/UAS-scRNAi              | 92          | 546.714        | 0.168278113       | 0.130309313          | 1.291374409 |
| 1G     | GMR-GAL4/UAS-scRNAi              | 68          | 410.579        | 0.165619771       | 0.130309313          | 1.270974168 |
| 1G     | GMR-GAL4,UAS-eyaRNAi/UAS-scRNAi  | 97          | 508.816        | 0.190638659       | 0.130309313          | 1.462970331 |
| 1G     | GMR-GAL4,UAS-eyaRNAi/UAS-scRNAi  | 76          | 491.94         | 0.154490385       | 0.130309313          | 1.185566719 |
| 1G     | GMR-GAL4,UAS-eyaRNAi/UAS-scRNAi  | 102         | 488.77         | 0.208687113       | 0.130309313          | 1.601475039 |
| 1G     | GMR-GAL4,UAS-eyaRNAi/UAS-scRNAi  | 96          | 475.836        | 0.201750183       | 0.130309313          | 1.548240703 |
| 1G     | GMR-GAL4,UAS-eyaRNAi/UAS-scRNAi  | 87          | 506.787        | 0.171669755       | 0.130309313          | 1.317402037 |
| 1G     | GMR-GAL4,UAS-eyaRNAi/UAS-scRNAi  | 93          | 572.223        | 0.162524051       | 0.130309313          | 1.247217461 |
| 1G     | GMR-GAL4,UAS-eyaRNAi/UAS-scRNAi  | 100         | 530.329        | 0.188562194       | 0.130309313          | 1.447035439 |
| 1G     | GMR-GAL4,UAS-eyaRNAi/UAS-scRNAi  | 58          | 364.011        | 0.158935844       | 0.130309313          | 1.222751008 |
| 1G     | GMR-GAL4,UAS-eyaRNAi/UAS-scRNAi  | 106         | 578.081        | 0.183365307       | 0.130309313          | 1.407154272 |
| 1G     | GMR-GAL4,UAS-eyaRNAi/UAS-scRNAi  | 85          | 565.587        | 0.15028634        | 0.130309313          | 1.153304671 |
| S2i    | GMR-GAL4/+                       | 56          | 546.87         | 0.102400936       | 0.102578397          | 0.99827     |
| S2i    | GMR-GAL4/+                       | 56          | 507.89         | 0.110260096       | 0.102578397          | 1.074886127 |
| S2i    | GMR-GAL4/+                       | 54          | 415.436        | 0.129983921       | 0.102578397          | 1.267166621 |
| S2i    | GMR-GAL4/+                       | 50          | 473.211        | 0.105661111       | 0.102578397          | 1.030052274 |
| S2i    | GMR-GAL4/+                       | 54          | 651.113        | 0.082934913       | 0.102578397          | 0.808502721 |
| S2i    | GMR-GAL4/+                       | 58          | 576.345        | 0.100634169       | 0.102578397          | 0.981046418 |
| S2i    | GMR-GAL4/+                       | 43          | 522.491        | 0.082298068       | 0.102578397          | 0.80229435  |
| S2i    | GMR-GAL4/+                       | 56          | 526.049        | 0.106453962       | 0.102578397          | 1.03778149  |
| S2i    | GMR-GAL4,UAS-eyaRNAi/+           | 50          | 542.78         | 0.092118354       | 0.102578397          | 0.89802879  |
| S2i    | GMR-GAL4,UAS-eyaRNAi/+           | 57          | 305.253        | 0.186730352       | 0.102578397          | 1.820367224 |
| S2i    | GMR-GAL4,UAS-eyaRNAi/+           | 89          | 545.114        | 0.163268601       | 0.102578397          | 1.59164703  |
| S2i    | GMR-GAL4,UAS-eyaRNAi/+           | 81          | 502.32         | 0.161251792       | 0.102578397          | 1.571985882 |
| S2i    | GMR-GAL4,UAS-eyaRNAi/+           | 69          | 528.263        | 0.130616757       | 0.102578397          | 1.273335918 |
| S2i    | GMR-GAL4,UAS-eyaRNAi/+           | 100         | 504.654        | 0.198155568       | 0.102578397          | 1.931747561 |
| S2i    | GMR-GAL4,UAS-eyaRNAi/+           | 57          | 303.503        | 0.18780704        | 0.102578397          | 1.830863471 |
| S2i    | GMR-GAL4,UAS-eyaRNAi/+           | 87          | 435.5          | 0.199770379       | 0.102578397          | 1.947489773 |
| S2i    | GMR-GAL4,UAS-eyaRNAi/+           | 71          | 426.822        | 0.16634569        | 0.102578397          | 1.621644467 |
| S2i    | GMR-GAL4,UAS-eyaRNAi/+           | 87          | 466.761        | 0.186390894       | 0.102578397          | 1.817057972 |
| S2i    | GMR-GAL4,UAS-eyaRNAi/UAS-stgRNAi | 62          | 535.699        | 0.115736636       | 0.102578397          | 1.128274951 |
| S2i    | GMR-GAL4,UAS-eyaRNAi/UAS-stgRNAi | 60          | 470.661        | 0.127480288       | 0.102578397          | 1.242759609 |
| S2i    | GMR-GAL4,UAS-eyaRNAi/UAS-stgRNAi | 50          | 436.585        | 0.114525236       | 0.102578397          | 1.116465446 |
| S2i    | GMR-GAL4,UAS-eyaRNAi/UAS-stgRNAi | 64          | 461.825        | 0.138580631       | 0.102578397          | 1.35097287  |
| S2i    | GMR-GAL4,UAS-eyaRNAi/UAS-stgRNAi | 50          | 496.471        | 0.100710817       | 0.102578397          | 0.981793633 |
| S2i    | GMR-GAL4,UAS-eyaRNAi/UAS-stgRNAi | 57          | 580.011        | 0.098273998       | 0.102578397          | 0.958037962 |
| S2i    | GMR-GAL4,UAS-eyaRNAi/UAS-stgRNAi | 44          | 408.776        | 0.107638413       | 0.102578397          | 1.049328284 |
| S2i    | GMR-GAL4,UAS-eyaRNAi/UAS-stgRNAi | 82          | 611.203        | 0.134161645       | 0.102578397          | 1.30789376  |
| S2i    | GMR-GAL4,UAS-eyaRNAi/pnt         | 22          | 172.467        | 0.127560635       | 0.102578397          | 1.243542677 |
| S2i    | GMR-GAL4,UAS-eyaRNAi/pnt         | 63          | 445.858        | 0.141300593       | 0.102578397          | 1.377488806 |
| S2i    | GMR-GAL4,UAS-eyaRNAi/pnt         | 50          | 433.299        | 0.115393758       | 0.102578397          | 1.12493236  |
| S2i    | GMR-GAL4,UAS-eyaRNAi/pnt         | 42          | 350.635        | 0.11978268        | 0.102578397          | 1.167718386 |
| S2i    | GMR-GAL4,UAS-eyaRNAi/pnt         | 48          | 323.991        | 0.148152263       | 0.102578397          | 1.44428328  |
| S2i    | GMR-GAL4,UAS-eyaRNAi/pnt         | 49          | 376.237        | 0.130237058       | 0.102578397          | 1.269634367 |
| S2i    | GMR-GAL4,UAS-eyaRNAi/pnt         | 28          | 186.737        | 0.149943503       | 0.102578397          | 1.461745436 |
| S2i    | GMR-GAL4,UAS-eyaRNAi/pnt         | 46          | 417.809        | 0.110098155       | 0.102578397          | 1.073307424 |
| S2i    | GMR-GAL4,UAS-eyaRNAi/pnt         | 62          | 490.58         | 0.126381018       | 0.102578397          | 1.23204322  |
| S2i    | GMR-GAL4,UAS-eyaRNAi/pnt         | 39          | 366.191        | 0.106501798       | 0.102578397          | 1.038247833 |
| S2i    | GMR-GAL4,UAS-eyaRNAi/ttk         | 115         | 574.588        | 0.200143407       | 0.102578397          | 1.951126291 |
| S2i    | GMR-GAL4,UAS-eyaRNAi/ttk         | 105         | 504.722        | 0.208035314       | 0.102578397          | 2.028061661 |
| S2i    | GMR-GAL4,UAS-eyaRNAi/ttk         | 129         | 530.986        | 0.242944258       | 0.102578397          | 2.368376436 |
| S2i    | GMR-GAL4,UAS-eyaRNAi/ttk         | 122         | 542.435        | 0.224911741       | 0.102578397          | 2.192583895 |
| S2i    | GMR-GAL4,UAS-eyaRNAi/ttk         | 125         | 606.749        | 0.206015997       | 0.102578397          | 2.008378064 |
| S2i    | GMR-GAL4,UAS-eyaRNAi/ttk         | 92          | 492.543        | 0.186785722       | 0.102578397          | 1.820907011 |
| 4G     | GMR-GAL4/+                       | 56          | 546.87         | 0.102400936       | 0.102578397          | 0.99827     |
| 4G     | GMR-GAL4/+                       | 56          | 507.89         | 0.110260096       | 0.102578397          | 1.074886127 |
| 4G     | GMR-GAL4/+                       | 54          | 415.436        | 0.129983921       | 0.102578397          | 1.267166621 |
| 4G     | GMR-GAL4/+                       | 50          | 473.211        | 0.105661111       | 0.102578397          | 1.030052274 |
| 4G     | GMR-GAL4/+                       | 54          | 651.113        | 0.082934913       | 0.102578397          | 0.808502721 |
| 4G     | GMR-GAL4/+                       | 58          | 576.345        | 0.100634169       | 0.102578397          | 0.981046418 |
| 4G     | GMR-GAL4/+                       | 43          | 522.491        | 0.082298068       | 0.102578397          | 0.80229435  |
| 4G     | GMR-GAL4/+                       | 56          | 526.049        | 0.106453962       | 0.102578397          | 1.03778149  |
| 4G     | GMR-GAL4,UAS-eyaRNAi/+           | 50          | 542.78         | 0.092118354       | 0.102578397          | 0.89802879  |
| 4G     | GMR-GAL4,UAS-eyaRNAi/+           | 57          | 305.253        | 0.186730352       | 0.102578397          | 1.820367224 |
| 4G     | GMR-GAL4,UAS-eyaRNAi/+           | 89          | 545.114        | 0.163268601       | 0.102578397          | 1.59164703  |
| 4G     | GMR-GAL4,UAS-eyaRNAi/+           | 81          | 502.32         | 0.161251792       | 0.102578397          | 1.571985882 |
| 4G     | GMR-GAL4,UAS-eyaRNAi/+           | 69          | 528.263        | 0.130616757       | 0.102578397          | 1.273335918 |
| 4G     | GMR-GAL4,UAS-eyaRNAi/+           | 100         | 504.654        | 0.198155568       | 0.102578397          | 1.931747561 |
| 4G     | GMR-GAL4,UAS-eyaRNAi/+           | 57          | 303.503        | 0.18780704        | 0.102578397          | 1.830863471 |
| 4G     | GMR-GAL4,UAS-eyaRNAi/+           | 87          | 435.5          | 0.199770379       | 0.102578397          | 1.947489773 |
| 4G     | GMR-GAL4,UAS-eyaRNAi/+           | 71          | 426.822        | 0.16634569        | 0.102578397          | 1.621644467 |
| 4G     | GMR-GAL4,UAS-eyaRNAi/+           | 87          | 466.761        | 0.186390894       | 0.102578397          | 1.817057972 |
| 4G     | GMR-GAL4,UAS-eyaRNAi/cg          | 56          | 495.476        | 0.113022629       | 0.102578397          | 1.101817071 |
| 4G     | GMR-GAL4,UAS-eyaRNAi/cg          | 53          | 466.863        | 0.113523668       | 0.102578397          | 1.106701518 |
| 4G     | GMR-GAL4,UAS-eyaRNAi/cg          | 64          | 460.657        | 0.138932004       | 0.102578397          | 1.354398274 |
| 4G     | GMR-GAL4,UAS-eyaRNAi/cg          | 58          | 536.181        | 0.108172427       | 0.102578397          | 1.054534192 |
| 4G     | GMR-GAL4,UAS-eyaRNAi/cg          | 63          | 611.002        | 0.103109319       | 0.102578397          | 1.005175767 |
| 4G     | GMR-GAL4/cg                      | 68          | 652.935        | 0.104145129       | 0.102578397          | 1.015273512 |
| 4G     | GMR-GAL4/cg                      | 57          | 554.549        | 0.102786228       | 0.102578397          | 1.002026072 |
| 4G     | GMR-GAL4/cg                      | 57          | 536.036        | 0.106336142       | 0.102578397          | 1.036632906 |
| 4G     | GMR-GAL4/cg                      | 49          | 520.675        | 0.094108609       | 0.102578397          | 0.917431076 |
| 4G     | GMR-GAL4/cg                      | 62          | 520.633        | 0.119085805       | 0.102578397          | 1.160924803 |
| 4G     | GMR-GAL4/cg                      | 55          | 403.476        | 0.136315419       | 0.102578397          | 1.328890129 |

| Figure | Genotype  | PH3+ Nuclei | MF length (µm) | PH3+ nuclei/µm MF | Normalization factor | Normalized  |
|--------|-----------|-------------|----------------|-------------------|----------------------|-------------|
| 4K     | w1118     | 30          | 474.36         | 0.063243107       | 0.073939409          | 0.855336925 |
| 4K     | w1118     | 34          | 442.618        | 0.076815674       | 0.073939409          | 1.038900301 |
| 4K     | w1118     | 37          | 517.855        | 0.071448572       | 0.073939409          | 0.966312454 |
| 4K     | w1118     | 35          | 523.093        | 0.066909708       | 0.073939409          | 0.9049262   |
| 4K     | w1118     | 46          | 503.944        | 0.091279983       | 0.073939409          | 1.23452412  |
| 4K     | cg        | 29          | 488.364        | 0.059381936       | 0.073939409          | 0.803116192 |
| 4K     | cg        | 35          | 523.413        | 0.066868802       | 0.073939409          | 0.904372954 |
| 4K     | cg        | 29          | 524.637        | 0.055276315       | 0.073939409          | 0.747589355 |
| 4K     | cg        | 50          | 420.637        | 0.118867337       | 0.073939409          | 1.607631694 |
| 4K     | cg        | 37          | 433.189        | 0.085413065       | 0.073939409          | 1.155176461 |
| 4K     | w1118     | 25          | 486.592        | 0.051377746       | 0.079716795          | 0.6445034   |
| 4K     | w1118     | 41          | 425.862        | 0.096275319       | 0.079716795          | 1.207716879 |
| 4K     | w1118     | 43          | 505.89         | 0.084998715       | 0.079716795          | 1.066258557 |
| 4K     | w1118     | 38          | 556.629        | 0.068268092       | 0.079716795          | 0.8563828   |
| 4K     | w1118     | 45          | 491.34         | 0.091586274       | 0.079716795          | 1.148895586 |
| 4K     | w1118     | 25          | 286.856        | 0.087151742       | 0.079716795          | 1.093267    |
| 4K     | w1118     | 21          | 348.586        | 0.060243383       | 0.079716795          | 0.755717575 |
| 4K     | w1118     | 37          | 583.373        | 0.063424259       | 0.079716795          | 0.795619773 |
| 4K     | w1118     | 45          | 497.627        | 0.090429177       | 0.079716795          | 1.134380484 |
| 4K     | w1118     | 38          | 536.913        | 0.070774967       | 0.079716795          | 0.887830061 |
| 4K     | w1118     | 48          | 559.981        | 0.085717194       | 0.079716795          | 1.075271448 |
| 4K     | w1118     | 56          | 563.387        | 0.099398815       | 0.079716795          | 1.24689928  |
| 4K     | w1118     | 55          | 577.684        | 0.095207761       | 0.079716795          | 1.194324988 |
| 4K     | w1118     | 22          | 312.874        | 0.070315846       | 0.079716795          | 0.882070657 |
| 4K     | w1118     | 29          | 359.879        | 0.08058264        | 0.079716795          | 1.010861512 |
| 4K     | cg        | 7           | 318.452        | 0.021981335       | 0.079716795          | 0.27574283  |
| 4K     | cg        | 4           | 305.762        | 0.01308207        | 0.079716795          | 0.164106827 |
| 4K     | cg        | 19          | 341.995        | 0.055556368       | 0.079716795          | 0.696921741 |
| 4K     | cg        | 19          | 323.141        | 0.058797882       | 0.079716795          | 0.73758437  |
| 4K     | cg        | 24          | 345.843        | 0.069395651       | 0.079716795          | 0.870527351 |
| 4K     | cg        | 6           | 497.179        | 0.012068088       | 0.079716795          | 0.151387021 |
| 4K     | cg        | 14          | 295.148        | 0.04743383        | 0.079716795          | 0.595029311 |
| 4K     | cg        | 9           | 447.52         | 0.020110833       | 0.079716795          | 0.252278494 |
| 4K     | cg        | 19          | 454.301        | 0.041822492       | 0.079716795          | 0.524638402 |
| 4K     | cg        | 16          | 389.32         | 0.041097298       | 0.079716795          | 0.515541269 |
| 4K     | cg        | 14          | 327.433        | 0.042756839       | 0.079716795          | 0.536359228 |
| 4P     | w1118     | 69          | 474.36         | 0.145459145       | 0.118448256          | 1.228039565 |
| 4P     | w1118     | 68          | 442.618        | 0.153631348       | 0.118448256          | 1.297033431 |
| 4P     | w1118     | 57          | 517.855        | 0.110069421       | 0.118448256          | 0.929261642 |
| 4P     | w1118     | 61          | 523.093        | 0.116614063       | 0.118448256          | 0.984514814 |
| 4P     | w1118     | 41          | 503.944        | 0.081358246       | 0.118448256          | 0.686867404 |
| 4P     | w1118     | 54          | 407.467        | 0.13252607        | 0.118448256          | 1.118852011 |
| 4P     | w1118     | 42          | 574.301        | 0.073132382       | 0.118448256          | 0.617420502 |
| 4P     | w1118     | 69          | 511.887        | 0.134795375       | 0.118448256          | 1.138010631 |
| 4P     | cg        | 20          | 515.697        | 0.038782463       | 0.118448256          | 0.32742114  |
| 4P     | cg        | 18          | 488.364        | 0.036857754       | 0.118448256          | 0.311171774 |
| 4P     | cg        | 40          | 523.413        | 0.076421487       | 0.118448256          | 0.645188789 |
| 4P     | cg        | 39          | 524.637        | 0.074337113       | 0.118448256          | 0.627591451 |
| 4P     | cg        | 22          | 420.637        | 0.052301628       | 0.118448256          | 0.441556758 |
| 4P     | cg        | 26          | 460.123        | 0.05650663        | 0.118448256          | 0.477057509 |
| 4P     | cg        | 26          | 433.189        | 0.060019991       | 0.118448256          | 0.506719077 |
| 4P     | cg        | 31          | 454.528        | 0.068202619       | 0.118448256          | 0.575800955 |
| 4P     | cg        | 16          | 514.268        | 0.031112183       | 0.118448256          | 0.262664762 |
| 4P     | cg,eya/cg | 16          | 182.531        | 0.087656343       | 0.079716795          | 1.099596929 |
| 4P     | cg,eya/cg | 16          | 207.106        | 0.077255125       | 0.079716795          | 0.969119808 |
| 4P     | cg,eya/cg | 24          | 293.887        | 0.081664041       | 0.079716795          | 1.024427043 |
| 4P     | cg,eya/cg | 31          | 371.614        | 0.083419893       | 0.079716795          | 1.046453164 |
| 4P     | cg,eya/cg | 19          | 346.394        | 0.054850835       | 0.079716795          | 0.688071245 |
| 4P     | cg,eya/cg | 22          | 264.687        | 0.08311704        | 0.079716795          | 1.042654058 |
| 4P     | cg,eya/cg | 19          | 268.543        | 0.07075217        | 0.079716795          | 0.887544083 |
| 4P     | cg,eya/cg | 32          | 322.333        | 0.099276214       | 0.079716795          | 1.245361331 |
| 4P     | cg,eya/cg | 35          | 372.252        | 0.094022329       | 0.079716795          | 1.17945445  |
| 4P     | cg,eya/cg | 30          | 295.35         | 0.101574403       | 0.079716795          | 1.27419075  |
| 4P     | cg,eya/cg | 34          | 340.11         | 0.099967658       | 0.079716795          | 1.254035077 |
| 4P     | cg,eya/cg | 34          | 360.751        | 0.094247833       | 0.079716795          | 1.182283264 |
| 4P     | cg,eya/cg | 41          | 495.548        | 0.082736687       | 0.079716795          | 1.037882759 |
| 4P     | cg,eya/cg | 31          | 414.68         | 0.074756439       | 0.079716795          | 0.937775263 |
| 4P     | cg,so/cg  | 37          | 517.049        | 0.071559949       | 0.118448256          | 0.604145229 |
| 4P     | cg,so/cg  | 34          | 423.706        | 0.08024432        | 0.118448256          | 0.677463079 |
| 4P     | cg,so/cg  | 39          | 290.777        | 0.1341234         | 0.118448256          | 1.132337485 |
| 4P     | cg,so/cg  | 36          | 391.558        | 0.091940402       | 0.118448256          | 0.776207309 |
| 4P     | cg,so/cg  | 29          | 418.977        | 0.06921621        | 0.118448256          | 0.584358202 |
| 4P     | cg,so/cg  | 35          | 433.791        | 0.080684016       | 0.118448256          | 0.681175212 |
| 4P     | cg,so/cg  | 31          | 266.749        | 0.116214119       | 0.118448256          | 0.981138285 |
| 4P     | cg,so/cg  | 42          | 386.117        | 0.108775319       | 0.118448256          | 0.918336183 |
| 4P     | cg,so/cg  | 41          | 381.308        | 0.107524626       | 0.118448256          | 0.907777195 |

**Table S1. Raw counts of PH3<sup>+</sup> nuclei, measurements of MF length, and normalizations used to quantify the fraction of mitotic cells at the SMW.** All PH3<sup>+</sup> nuclei in the SMW were manually counted using the multi-point selection tool in FIJI and divided by the length of the MF, measured with the segmented line tool, to obtain the number of mitotic cells per micron of the MF. Counts and measurements were carried out in unaltered confocal images to retain the three-dimensional nature of the tissue, and measurements included the entire length of the SMW,

including in cases where parts of the tissue folded under the rest of the disc. In rare instances where PH3<sup>+</sup> nuclei could not be resolved unambiguously, that portion of the disc was not analyzed. Figs. 1X and 4G present data for *GMR/+* and *eya<sup>RNAi</sup>* from the same experiment that was carried out in parallel. Fig. 1G has the same sample sizes, but represents data from a different experiment.
